# Supplementary material for: Efficacy of interventions to increase physical activity for people with heart failure: a meta-analysis
Source: HighWire-hosted journal article supplement (doi:10.1136/openhrt-2021-001687), 2021-06-01

TITLE: Efficacy of interventions to increase physical activity for people with heart failure: a meta-analysis

## Supplement 1. Search strategy

### A. Search Strategy (Interface - EBSCOhost Research Databases):

**OR/1-22:** (MM "Heart Failure+"), "heart failure", (MM "Cardiac Output, Decreased"), (MM "Ventricular Dysfunction+"), heart N5 fail\*, cardi\* N4 dysfunction\*, heart N5 dysfunction\*, "congestive heart failure", "cardiac fail\*", "systolic heart failure", "cardiac incompetence", "cardiac decompensation", "cardiac insufficiency", "chronic heart failure", "cardial insufficiency", "myocardial failure", "myocardial insufficiency", "heart N3 fail\*", "diastolic dysfunction\*", "Systolic dysfunction\*", "heart N3 dysfunction\*", "cardiac dysfunction\*".

**OR/24-46:** (MH "Behavioral Changes"), (MH "Life Style Changes") , (MM "Self Care+") , "Self-management", "Intervention", (MM "Early Intervention+") , (MM "Patient Care+") , (MM, "Rehabilitation+"), (MM "Home Rehabilitation+") , (MM "Rehabilitation, Cardiac+") , (MM "Rehabilitation, Community-Based"), (MH "Physical Education, Adapted"), (MH "Behavioral Objectives"), (MH "Psychosocial Adjustment: Life Change (Iowa NOC), (MH "Change Management") , (MH "Behavior Management (Iowa NIC)", (MH "Health Behavior") , (MH "Psychotherapy+", "Behavioral intervention", "Behavioral change technique\*", "Behavioral change", "Counselling", "Psychotherapy".

**OR/48-62:** (MH "Physical Activity"), (MH "Sports+"), (MH "Activities of Daily Living+"), (MH "Exercise+"), (MH "Leisure Activities+"), (MH "Physical Fitness+"), (MH "Movement"), (MH "Aerobic Exercise+"), (MH "Swimming"), (MH "Rehabilitation, Cardiac"), (MH "Resistance training"), (MH "Sports Specific Training"), (MH "Group Exercise"), Physical N5 activ\*, Exercis\*.

**OR/64-66:** (MH "Randomized Controlled Trials"), "Randomized controlled trial", "Clinical trial".

23 AND 47 AND 63

23 AND 47 AND 63 AND 67

### B. Search Strategy (Interface - OVID):

1. exp heart failure/
2. heart failure.mp.
3. heart decompensation.mp.
4. heart insufficiency.mp.
5. cardiac failure.mp.
6. cardiac incompetence.mp.
7. cardiac decompensation.mp.
8. cardiac insufficiency.mp.
9. exp heart output/
10. cardiac output.mp.
11. exp diastolic dysfunction/
12. exp congestive heart failure/
13. diastolic dysfunction.mp.
14. exp systolic dysfunction/
15. exp heart left ventricle failure/
16. heart left ventricle failure.mp.
17. cardiac insufficiency.mp.
18. chronic heart failure.mp.
19. chronic heart insufficiency.mp.
20. decompensation,heart.mp.
21. myocardial failure.mp.
22. myocardial insufficiency.mp.
23. (heart adj3 fail\*).tw.
24. (heart adj3 dysfunction\*).tw.
25. left ventricular dysfunction.tw.
26. (cardiac adj3 dysfunction\*).tw.
27. (cardiac adj3 fail).tw.
28. ventricular dysfunction.mp.
29. chronic cardiac failure.mp.
30. congestive cardiac failure.mp.
31. 1 or 2 or 3 or 4 or 5 or 6 or 7 or 8 or 9 or 10 or 11 or 12 or 13 or 14 or 15 or 16 or 17 or 18 or 19 or 20 or 21 or 22 or 23 or 24 or 25 or 26 or 27 or 28 or 29 or 30

# TITLE: Efficacy of interventions to increase physical activity for people with heart failure: a meta-analysis

32. exp physical activity/
33. physical exercise.mp.
34. physical activity.mp.
35. exercise.mp.
36. exp aerobic exercise/
37. aerobic exercise.mp.
38. exp resistance training/
39. resistance training.mp.
40. exercise training.mp.
41. exp daily life activity/
42. exp walking/
43. exp motor activity/
44. daily physical activity.mp.
45. exp motor activity/
46. exp leisure/
47. leisure activities.mp.
48. exp heart rehabilitation/
49. cardiac rehabilitation.mp.
50. exercise program.mp.
51. exercise programme.mp.
52. exp fitness/
53. exp swimming/
54. exp sport/
55. exp endurance training/
56. (physic\* adj3 activ\*).tw.
57. physical activity.tw.
58. exercis\*.tw.
59. walk\*.tw.
60. (daily adj5 physic adj5 activ\*).tw.
61. 32 or 33 or 34 or 35 or 36 or 37 or 38 or 39 or 40 or 41 or 42 or 43 or 44 or 45 or 46 or 47 or 48 or 49 or 50 or 51 or 52 or 53 or 54 or 55 or 56 or 57 or 58 or 59 or 60
62. 31 and 61
63. exp intervention study/
64. intervention.mp.
65. exp health promotion/
66. exp behavior change/
67. behavioral intervention.mp.
68. behaviour change.mp.
69. exp behavior change/
70. psychological intervention.mp.
71. exp patient education/
72. exp counseling/
73. exp patient counseling/
74. behav\* change.tw.
75. (change adj3 behavio\$r).tw.
76. intervention.tw.
77. health promotion.tw.
78. behavio\$r change technique\*.tw.
79. behavio\$r change strateg\*.tw.
80. BCT.tw.
81. randomized controlled trial.tw.
82. randomized controlled trial/
83. clinical trial/
84. controlled study/
85. RCT.mp.
86. 81 or 82 or 83 or 84 or 85
87. cardiac rehabilitation.tw.
88. 63 or 64 or 65 or 66 or 67 or 68 or 69 or 70 or 71 or 72 or 73 or 74 or 75 or 76 or 77 or 78 or 79 or 80 or 87
89. 31 and 61 and 86 and 88

TITLE: Efficacy of interventions to increase physical activity for people with heart failure: a meta-analysis

Supplement 2. Risk of bias: individual studies

| Study ID                       | Experimental                                              | Comparator                 | Randomization process | Deviations from intended interventi | Missing outcome data | Measurement of the outcome | Selection of the reported result | Overall |               |
|--------------------------------|-----------------------------------------------------------|----------------------------|-----------------------|-------------------------------------|----------------------|----------------------------|----------------------------------|---------|---------------|
| Ajiboye et al. 2015            | Aerobic and reistnace and education traning               | Education                  | +                     | ?                                   | +                    | -                          | ?                                | -       | Low risk      |
| Bernocchi et al. 2018          | Telerehabilitation with personalised exercise             | Usual care                 | +                     | ?                                   | +                    | +                          | +                                | +       | Some concerns |
| Boyne et al. 2015              | Individually tailored e-health intervention               | Education                  | +                     | ?                                   | +                    | +                          | ?                                | !       | High risk     |
| Brodie et al. 2005             | Motivational interviewing and education                   | Education                  | +                     | ?                                   | +                    | +                          | +                                | +       |               |
| Brodie et al. 2005             | Motivational interviewing                                 | Education                  | +                     | ?                                   | +                    | +                          | +                                | +       |               |
| Collins et al. 2004            | Aerobic exercise training                                 | Usual care                 | ?                     | ?                                   | +                    | +                          | ?                                | !       |               |
| Corvera-Tindel et al. 2004     | Aerobic exercise training                                 | Usual care                 | ?                     | +                                   | +                    | +                          | +                                | !       |               |
| Cowie et al. 2013              | Home-based exercise training                              | Usual care                 | ?                     | ?                                   | +                    | +                          | +                                | !       |               |
| Cowie et al. 2013              | Hospital-based exercise training                          | Usual care                 | ?                     | ?                                   | +                    | +                          | +                                | !       |               |
| Dalal et al. 2018              | The rehabilitaiton enablement in chronic heart failure    | Usual care                 | +                     | +                                   | +                    | +                          | +                                | +       |               |
| Freedland et al. 2015          | Cognitive Behavioural Therapy                             | Education                  | +                     | +                                   | +                    | +                          | +                                | +       |               |
| Jolly et al. 2009              | Aerobic and resistance exercise care                      | Usual care                 | +                     | ?                                   | +                    | ?                          | ?                                | !       |               |
| Meng et al. 2016               | Self-management patient education program                 | Education                  | ?                     | +                                   | ?                    | ?                          | +                                | !       |               |
| O'Connor et al. 2009           | Aerobic exercise training exercise adherence intervention | Usual care                 | +                     | +                                   | +                    | +                          | +                                | +       |               |
| Pozehl et al. 2018             | Multicomponent intervention with exercise                 | Usual care                 | ?                     | ?                                   | +                    | ?                          | +                                | !       |               |
| Smeulders et al. 2009          | Chronic disease managment                                 | Usual care                 | +                     | +                                   | +                    | +                          | +                                | +       |               |
| Tomita et al. 2008             | Multidisciplinary internet program                        | Usual care                 | +                     | ?                                   | ?                    | -                          | ?                                | -       |               |
| Van den Berg-Emons et al. 2004 | Aerobic exercise training                                 | Usual care                 | +                     | ?                                   | +                    | +                          | ?                                | !       |               |
| Wellenheimer et al. 1998       | Aerobic exercise training                                 | Discouragement to exercise | +                     | ?                                   | +                    | ?                          | ?                                | !       |               |
| Witham et al. 2005             | Seated aerobic exercise                                   | Usual care                 | +                     | +                                   | +                    | +                          | ?                                | !       |               |
| Yeh et al. 2004                | Tai-Chi mind body exercise                                | Usual care                 | +                     | +                                   | +                    | +                          | ?                                | !       |               |
| Young et al. 2015              | Patient activation programme on self-management           | Usual care                 | +                     | ?                                   | +                    | +                          | +                                | !       |               |

TITLE: Efficacy of interventions to increase physical activity for people with heart failure: a meta-analysis

Supplement 3. The dispersion of the underlying main effect

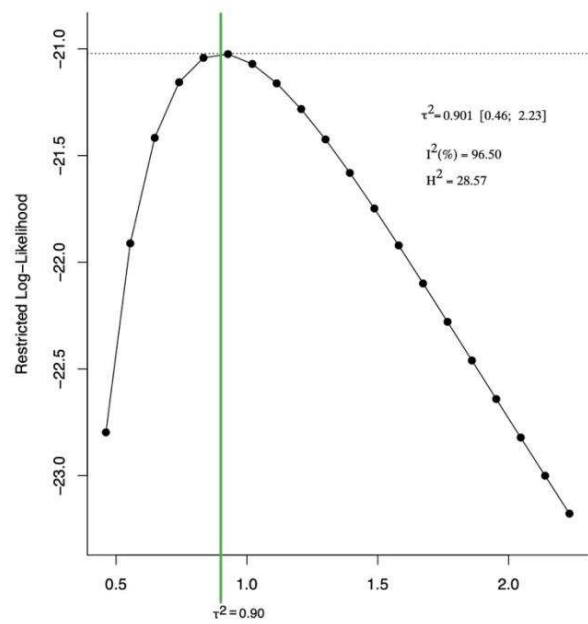

The dispersion (tau) of the underlying main effect.

TITLE: Efficacy of interventions to increase physical activity for people with heart failure: a meta-analysis

**Supplement 4. Intervention characteristics (expanded Table 2)**

| Author, year                    |                             | Intervention description                                                                                            | Behaviour Change Techniques                    | Intervention intensity                                     | Facilitator                        | mode of delivery                                                    | Theory (TCS) |
|---------------------------------|-----------------------------|---------------------------------------------------------------------------------------------------------------------|------------------------------------------------|------------------------------------------------------------|------------------------------------|---------------------------------------------------------------------|--------------|
| Ajiboye et al., 2015            | <i>Main intervention</i>    | Aerobic and resistance training and education                                                                       | BP/R; GT                                       | 36 session; 60-minute sessions; three a week (36 sessions) | nr                                 | face-to-face                                                        | none         |
|                                 | <i>Comparator treatment</i> | usual care and education                                                                                            | PI                                             |                                                            |                                    |                                                                     |              |
| Bernocchi et al., 2018          | <i>Main intervention</i>    | integrated telerehabilitation home-based programme (Telereab- HBP) with personalised exercise maintenance programme | IHC; CS: IHPB; AOE; BP/R; GT; SMB; MbBOwF; FB; | nr                                                         | Nurse tutor; physiotherapist tutor | telemonitoring of vital signs. Mini-ergometer, pedometer and diary. | none         |
|                                 | <i>Comparator treatment</i> | usual care                                                                                                          | IHC                                            |                                                            |                                    |                                                                     |              |
| van den Berg-Emons et al., 2004 | <i>Main intervention</i>    | aerobic exercise training                                                                                           | AP; BP/R; GS(B);                               | 24 sessions, 60-minute sessions twice a week (12 weeks)    | not reported                       | hospital-based training in groups                                   | none         |
|                                 | <i>Comparator treatment</i> | usual care without particular advice for exercise                                                                   | none                                           | not reported                                               | not reported                       | not reported                                                        | none         |

## TITLE: Efficacy of interventions to increase physical activity for people with heart failure: a meta-analysis

| Author, year         |                             | Intervention description                                    | Behaviour Change Techniques          | Intervention intensity                               | Facilitator                                                    | mode of delivery                                      | Theory (TCS) |
|----------------------|-----------------------------|-------------------------------------------------------------|--------------------------------------|------------------------------------------------------|----------------------------------------------------------------|-------------------------------------------------------|--------------|
| Boyne et al., 2014   | <i>Main intervention</i>    | Individually tailored e-health intervention 'Health Buddy.' | IHC; SMB; SMOB                       | 364 sessions: daily 10-minute session (52 weeks)     | HF nurse and a nurse assistant                                 | Telemonitoring device 'Health Buddy.'                 | none         |
|                      | <i>Comparator treatment</i> | education                                                   | IHC                                  | not reported                                         | not reported                                                   | Home-based, individual                                | none         |
| Brodie et al., 2005  | <i>Main intervention</i>    | Motivational Interviewing                                   | GT; IHC; PS; SC; SMB; SS(E); SS(U);  | Eight sessions: Weekly 60- minute sessions (8 weeks) | A researcher without clinical qualification                    | home-based Face-to-face sessions                      | MI (TCS = 2) |
|                      | <i>Main intervention</i>    | Motivational interviewing + education                       | GT; PS; SC; SMB; SS(E); SS(U)        | Eight sessions: Weekly 60- minute sessions (8 weeks) | HF specialist nurse; researcher without clinical qualification | home-based Face-to-face sessions + Usual care package | MI (TCS = 2) |
|                      | <i>Comparator treatment</i> | education                                                   | IHC                                  | not reported                                         | HF specialist nurse                                            | Usual care package                                    | none         |
| Collins et al., 2004 | <i>Main intervention</i>    | Aerobic exercise training                                   | AOE; AP; BP/R; GS(B); GT; IHPB; RP/C | 120 sessions five days a week 50 minutes (24 weeks)  | Exercise physiologist or nurse                                 | Supervised group-based                                | none         |

## TITLE: Efficacy of interventions to increase physical activity for people with heart failure: a meta-analysis

| Author, year                |                             | Intervention description                 | Behaviour Change Techniques                                         | Intervention intensity                                     | Facilitator         | mode of delivery             | Theory (TCS) |
|-----------------------------|-----------------------------|------------------------------------------|---------------------------------------------------------------------|------------------------------------------------------------|---------------------|------------------------------|--------------|
|                             | <i>Comparator treatment</i> | usual care                               | none                                                                | not reported                                               | not reported        | not reported                 | none         |
| Corvera-Tindel et al., 2004 | <i>Main intervention</i>    | A home walking exercise programme        | BP/R; GS(B); GT; MBbOwF; MOBwF; SMB                                 | 60 sessions: 60 minutes 5 days a week (12 weeks)           | nurse               | Home-based, Supervised       | none         |
|                             | <i>Comparator treatment</i> | usual care                               | MBbOwF                                                              | not reported                                               | not reported        | not reported                 | none         |
| Cowie et al., 2011          | <i>Main intervention</i>    | hospital-based aerobic exercise training | Intervention 1: AP; BP/R; DB; GS(B); GT; IHC; IHPB; RBG; SMB; SMOB; | 16 sessions: 60 minutes sessions, Twice a week eight weeks | Exercise instructor | Face-to-face, hospital-based | none         |
|                             | <i>Main intervention</i>    | home-based exercise training             | Intervention 2: AP; BP/R ; DB; GS(B); GT; GTB: IHC; IHPB: SMOB;     | 16 sessions: 30 minutes sessions, Twice a week eight weeks | physiotherapist     | home-based, individual (DVD) | none         |
|                             | <i>Comparator treatment</i> | usual care                               | none                                                                | not reported                                               | not reported        | not reported                 | none         |

## TITLE: Efficacy of interventions to increase physical activity for people with heart failure: a meta-analysis

| Author, year                      |                             | Intervention description                                                                                    | Behaviour Change Techniques                                                              | Intervention intensity                                                                    | Facilitator                                    | mode of delivery                             | Theory (TCS)           |
|-----------------------------------|-----------------------------|-------------------------------------------------------------------------------------------------------------|------------------------------------------------------------------------------------------|-------------------------------------------------------------------------------------------|------------------------------------------------|----------------------------------------------|------------------------|
| Dalal et al., 2018 (REACH-HF)     | <i>Main intervention</i>    | the Rehabilitation Enablement in Chronic Heart Failure (REACH-HF) self-care and rehabilitation intervention | BP/R; RNE; RPE; IHC; SS(E); SS(P); SS(U); GT; GS; PS; RBG; SMB                           | at least three face-to-face sessions; via phone - unspecified; 12 weeks                   | Two trained cardiac nurses                     | nr                                           | SDT, CSM, CT (TCS = 5) |
|                                   | <i>Comparator treatment</i> | usual care                                                                                                  | IHC                                                                                      |                                                                                           |                                                |                                              |                        |
| Freedland et al., 2018            | <i>main intervention</i>    | Integrative Cognitive Behaviour Therapy + Enhanced (with education) usual care                              | IHC; GS(B); AP; CS; IHPB; PS; MBOwF; MOBwF; ST; PC;                                      | 25 sessions; 60-minute sessions; once a week; 4 education sessions via phone (30 minutes) | Clinical psychology trainee (graduate student) | nr                                           | CBT (TCS = 6)          |
|                                   | <i>Comparator treatment</i> | Enhanced (with education) usual care                                                                        | IHC                                                                                      | Four education sessions via phone (30 minutes)                                            | Nurse                                          | nr                                           | none                   |
| O'Connor et al., 2009 (HF-ACTION) | <i>Main intervention</i>    | Aerobic exercise training + Exercise adherence facilitation intervention                                    | AOE; AP; BP/R; CS; GS(B); GT; GTB; IHC; IHPB; PC; SMB; SMOB; SS(E); MBbOwF; SS(P); SS(U) | 72 sessions, three sessions per week (24 weeks)                                           | Physiotherapist                                | Facility-based group-based exercise training | TTM, SCT (TCS = 7)     |
|                                   | <i>Comparator treatment</i> | usual care                                                                                                  | CS; GS(B); IHC; MBbOwF; SS(U);                                                           | not reported                                                                              | not reported                                   | not reported                                 | none                   |



## TITLE: Efficacy of interventions to increase physical activity for people with heart failure: a meta-analysis

| Author, year                     |                             | Intervention description                                                                | Behaviour Change Techniques                                               | Intervention intensity                                                                                                                        | Facilitator                                     | mode of delivery         | Theory (TCS)  |
|----------------------------------|-----------------------------|-----------------------------------------------------------------------------------------|---------------------------------------------------------------------------|-----------------------------------------------------------------------------------------------------------------------------------------------|-------------------------------------------------|--------------------------|---------------|
| Jolly et al., 2009               | <i>Main intervention</i>    | Aerobic and resistance exercise training                                                | AP; BC; BP/R; DB; GS(B); GT; IHC; IHPB SMB; SS(U)                         | Three supervised exercise sessions; 3 home visits; 3 telephone sessions; 120 self-applied sessions (5 times a week) 20-30 minutes (24 weeks)  | PA instructor                                   | Home-based, face-to-face | none          |
|                                  | <i>Comparator treatment</i> | HF specialist nurse care                                                                | IHC                                                                       | not reported                                                                                                                                  | HF specialist nurse                             | not reported             | none          |
| Meng et al., 2016                | <i>Main intervention</i>    | self-management patient education program + inpatient cardiac rehabilitation            | IHC; GS(B); AP; PS; RBG; SMB; FPS; IHPB; BF                               | Five sessions; 60-75 minutes; 2 sessions a week (approx), three-week session;                                                                 | Physician; nurse; psychologist; physiotherapist | face-to-face             | <b>nr</b>     |
|                                  | <i>Comparator treatment</i> | education                                                                               | IHC                                                                       | One session; 60 minutes                                                                                                                       | physician                                       | face-to-face             |               |
| Pozehl et al., 2018 (HEART Camp) | <i>Main intervention</i>    | multicomponent intervention Heart Failure Exercise and Resistance Training (Heart Camp) | IHTB; BP/R; BF; IEC; iHC; MOBwF; SS(U); GS(B); RBG; PS; VPAC; FB; BF; SMB | Six group-based educational sessions (adoption: 6 and months), self-administered (maintenance at 13-18 months) one session a week (18 months) | coach trainer                                   | nr                       | SCT (TCS = 5) |

## TITLE: Efficacy of interventions to increase physical activity for people with heart failure: a meta-analysis

| Author, year              |                             | Intervention description                                       | Behaviour Change Techniques                                   | Intervention intensity                                                                                                 | Facilitator                                  | mode of delivery                                         | Theory (TCS)       |
|---------------------------|-----------------------------|----------------------------------------------------------------|---------------------------------------------------------------|------------------------------------------------------------------------------------------------------------------------|----------------------------------------------|----------------------------------------------------------|--------------------|
|                           | <i>Comparator treatment</i> | Enhanced (nine exercise sessions for three months)             | IHPB; BP/R                                                    | nr                                                                                                                     | nr                                           | face-to-face                                             | none               |
| Smeulders et al., 2009    | <i>Main intervention</i>    | Chronic disease management programme                           | AP; BC; BE; BP/R; D; DB; FB; IHC; ISRM; PS; R; RNE; SS(U); ST | Six sessions 150 minutes once a week (6 weeks)                                                                         | Lay leader (HF patient); HF specialist nurse | Hospital-based group-based exercise training and classes | SLT ( TCS = 8)     |
|                           | <i>Comparator treatment</i> | usual care                                                     | none                                                          | not reported                                                                                                           | HF specialist nurse                          | not reported                                             | none               |
| Tomita et al., 2008       | <i>Main intervention</i>    | Multidisciplinary Internet-based programme on management of HF | FB; IHC; IHPB; SMB                                            | Forty-two sessions, 3.5 sessions a month for about 10 minutes. 1-year e-health intervention                            | Self-applied (Website)                       | Home-based, internet-based (website)                     | TTM, SST (TCS = 2) |
|                           | <i>Comparator treatment</i> | Usual care                                                     | none                                                          | not reported                                                                                                           | not reported                                 | not reported                                             |                    |
| Willenheimer et al., 2001 | <i>Main intervention</i>    | Aerobic exercise training                                      | AP; BP/R; DB; GS(B); GT; IHPB                                 | 41 session: 2 sessions a week (15 minutes) for seven weeks: and then three sessions a week (45 minutes) for nine weeks | physiotherapist                              | Hospital-based, Group-based exercise training            | none               |

## TITLE: Efficacy of interventions to increase physical activity for people with heart failure: a meta-analysis

| Author, year        |                             | Intervention description                                                         | Behaviour Change Techniques                  | Intervention intensity                                                                                                            | Facilitator         | mode of delivery                                                                                                                                 | Theory (TCS) |
|---------------------|-----------------------------|----------------------------------------------------------------------------------|----------------------------------------------|-----------------------------------------------------------------------------------------------------------------------------------|---------------------|--------------------------------------------------------------------------------------------------------------------------------------------------|--------------|
|                     | <i>Comparator treatment</i> | usual care + discouragement to exercise                                          | PI                                           | 16 weeks                                                                                                                          | nr                  | not reported                                                                                                                                     | none         |
| Witham et al., 2005 | <i>Main intervention</i>    | Seated aerobic exercise training followed by seated resistance exercise training | BP/R; GS(B); GT; GTB; IHC; MOBwF; SMB; SS(U) | 17-20 sessions 20-minute session Twice a week (12 weeks)                                                                          | Physiotherapist     | Group-based, hospital-based exercise training (supervised and home settings) Followed by home self-monitoring, self-monitoring and goal setting. | none         |
|                     | <i>Comparator treatment</i> | usual care                                                                       | IHC                                          | nr                                                                                                                                | nr                  | not reported                                                                                                                                     | none         |
| Yeh et al., 2011    | <i>Main intervention</i>    | Exercise training (Tai Chi Mind-Body movement)                                   | AP; BC; BP/R; DB; GS(B); IHPB; SMB           | twice a week (group sessions); three times a week home sessions) one hour (group sessions); 35 minutes (home sessions) (12 weeks) | Exercise instructor | Hospital-based, Group-based exercise training                                                                                                    | none         |

## TITLE: Efficacy of interventions to increase physical activity for people with heart failure: a meta-analysis

| Author, year            |                             | Intervention description                                                                         | Behaviour Change Techniques                             | Intervention intensity                                                                                                                                               | Facilitator             | mode of delivery                                        | Theory (TCS) |
|-------------------------|-----------------------------|--------------------------------------------------------------------------------------------------|---------------------------------------------------------|----------------------------------------------------------------------------------------------------------------------------------------------------------------------|-------------------------|---------------------------------------------------------|--------------|
|                         | <i>Comparator treatment</i> | usual care                                                                                       | none                                                    | Not reported                                                                                                                                                         | Video recording         | Followed by home-based exercise training and monitoring | none         |
| Young et al. 2015; 2016 | <i>Main intervention</i>    | Patient Activation Intervention on self-management in HF (Patient AcTivated Care at Home: PATCH) | IHC; DB; IHPB; SMOB; ;GS(B); IAwCB; SC; VC; MBbOwF; NSI | 12 sessions (45 minutes); one in a hospital and then twice a week for the first two weeks, once a week for weeks 3–6, and every other week for weeks 7–12 (12 weeks) | Advanced practice nurse | one session face-to-face; telephone                     | none         |
|                         | <i>Comparator treatment</i> | Usual care                                                                                       | IHC                                                     | 50-minute one session                                                                                                                                                | nurse                   | face-to-face                                            | none         |

Note: TCS – Theory Coding Scheme; nr – not reported; MI – Motivational Interviewing, SDT – Self-determination theory; CSM -- CT—Control Theory; CBT—Cognitive Behavioural Therapy; TTM – Transtheoretical Model of Change; SCT—Social Cognitive Theory; SLT – Social Learning theory; SST; AOE – 12.5. Adding objects to the environment; AP – 1.4. Action planning; BC –12.6. Body changes; BE – 4.4. Behavioural experiments: BP/R – 8.1. Behavioural practice/rehearsal; BF - Biofeedback; CS – 9.2. Credible source; D – 12.4. Distraction; DB – 6.1. Demonstration of the behaviour; FB – 2.2. Feedback on behaviour; FPS - 15.3. Focus on past success; GS(B) – 1.1. Goal setting (behaviour); GT – 8.7. Graded tasks; GTB – 8.6. Generalisation of target behaviour; IEC - 5.6. Information about emotional consequences; IHC – 5.1 Information about health consequences; IHPB – 4.1. Instruction on how to perform the behaviour; IAwCB – 13.5. Identity associated with changed behaviour; ISRM – 13.1. Identification of self as a role model; MBbOwF - 2.5. Monitoring of behaviour by others without feedback; MOBwF – 2.5. Monitoring of outcomes of behaviour without feedback; NSI – non-specific incentive; PC – 7.1. Prompts/cues; PS – 1.2. Problem-solving; R – 4.3. Reattribution; RBG – 1.5. Review behaviour goal(s); RNE –11.2. Reduce negative emotions; RP/C – 7.3. Reduce prompts/cues; RPE - 12.1. Restructuring the physical environment; SC – 6.2. Social comparison; SMB – 2.3. Self-monitoring of behaviour; SMOB – 2.4. Self-monitoring of outcome(s) of behaviour; SS(E) – 3.3. Social support (emotional); SS(P) –3.2. Social support (practical); SS(U) – 3.1. Social support (unspecified); ST – 15.4. Self-talk; VPAC - 15.1. Verbal persuasion about capability; VC - 16.3. Vicarious consequences

TITLE: Efficacy of interventions to increase physical activity for people with heart failure: a meta-analysis

**Supplement 5. Intervention and participant characteristics, as well as method of assessment that did not significantly contribute to intervention efficacy**

| Variable                                                     | SMD/b | CI, 95% (lower) | CI, 95% (upper) |
|--------------------------------------------------------------|-------|-----------------|-----------------|
| <b>Theory use:</b>                                           |       |                 |                 |
| Theory use score (overall, TCS)                              | 0.13  | -0.01           | 0.27            |
| Theory mentioned                                             | 0.46  | -0.23           | 1.15            |
| <b>Behaviour Change Techniques:*</b>                         |       |                 |                 |
| Self-monitoring of behavior                                  | 0.49  | -0.04           | 1.03            |
| Information about health consequences                        | 0.50  | -0.05           | 1.06            |
| Social support (emotional)                                   | 0.92  | -0.08           | 1.92            |
| Instruction on how to perform a behavior                     | 0.51  | -0.11           | 1.13            |
| Social support (unspecified)                                 | 0.53  | -0.19           | 1.25            |
| Demonstration of the behavior                                | 0.37  | -0.39           | 1.12            |
| Feedback on behavior                                         | 0.31  | -0.77           | 1.38            |
| Problem solving                                              | 0.05  | -0.92           | 1.02            |
| Monitoring outcome(s) of behavior by others without feedback | 0.32  | -0.92           | 1.56            |
| Behavioral contract                                          | 0.30  | -0.93           | 1.53            |
| Biofeedback                                                  | 0.50  | -1.01           | 2.01            |
| Review behavior goal(s)                                      | 0.18  | -1.08           | 1.43            |
| Reduce negative emotions                                     | 0.07  | -1.17           | 1.30            |
| Information about emotional consequences                     | 0.04  | -1.47           | 1.56            |
| Vicarious consequences                                       | 0.23  | -1.47           | 2.39            |
| Self-talk                                                    | 0.04  | -1.48           | 1.55            |
| Social comparison                                            | 0.02  | -1.55           | 1.60            |
| Behavioral experiments                                       | 0.21  | -1.93           | 2.34            |
| Distraction                                                  | 0.21  | -1.93           | 2.34            |
| Identification of self as role model                         | 0.21  | -1.93           | 2.34            |
| Reattribution                                                | 0.21  | -1.93           | 2.34            |
| Identity associated with changed behaviour                   | 0.23  | -1.93           | 2.39            |
| Non-specific incentive                                       | 0.23  | -1.93           | 2.39            |
| Restructuring the physical environment                       | 0.13  | -2.01           | 2.27            |
| Reduce prompts/cues                                          | 0.04  | -2.22           | 2.31            |
| Social support (practical)                                   | 1.42  | -2.22           | 2.46            |
| Discrepancy between current behavior and goal                | -0.14 | -2.28           | 2.01            |

TITLE: Efficacy of interventions to increase physical activity for people with heart failure: a meta-analysis

|                                                                            |       |       |      |
|----------------------------------------------------------------------------|-------|-------|------|
| <b>Intervention intensity:</b>                                             |       |       |      |
| Number of sessions                                                         | 0.00  | -0.01 | 0.01 |
| Duration, single session (mins)                                            | 0.00  | 0.00  | 0.01 |
| Intervention contact time (mins)                                           | 0.00  | 0.00  | 0.00 |
| intervention duration (weeks)                                              | -0.01 | -0.04 | 0.02 |
| Individually delivered                                                     | 0.30  | -0.47 | 1.06 |
| <b>Setting:</b>                                                            |       |       |      |
| Home-setting                                                               | 0.16  | -0.66 | 0.99 |
| <b>Facilitator:</b>                                                        |       |       |      |
| Telehealth                                                                 | 0.73  | -0.79 | 2.25 |
| Nurse                                                                      | 0.34  | -0.38 | 1.05 |
| HF nurse                                                                   | 0.09  | -1.18 | 1.36 |
| Researcher                                                                 | 0.29  | -1.25 | 1.82 |
| Self-applied                                                               | 0.21  | -1.35 | 1.76 |
| Lay leader                                                                 | 0.21  | -1.93 | 2.34 |
| Advanced practice nurse                                                    | 0.23  | -1.93 | 2.39 |
| Cardiac nurse                                                              | 0.13  | -2.01 | 2.27 |
| Website                                                                    | 0.00  | -2.25 | 2.25 |
| Graduate student therapist (trained)                                       | -0.14 | -2.28 | 2.01 |
| <b>Participant characteristics:</b>                                        |       |       |      |
| Age                                                                        | 0.01  | 0.00  | 0.01 |
| Males included in the sample, (%)                                          | 0.01  | 0.00  | 0.02 |
| LVEF, (%)                                                                  | 0.01  | 0.00  | 0.02 |
| <b>Physical activity assessment:</b>                                       |       |       |      |
| Self-reports                                                               | 0.68  | -0.06 | 1.41 |
| Accelerometer                                                              | 0.31  | 0.07  | 0.56 |
| Difference in efficacy between trials using accelerometers vs self-reports | -0.32 | -1.15 | 0.51 |

\*(BCTTV1 taxonomy: Michie et al., 2013)

TITLE: Efficacy of interventions to increase physical activity for people with heart failure: a meta-analysis

### Supplement 6. Sensitivity analysis: results

| EXCLUDED TRIALS                                                                                                                                | Overall effect                     | General Approach                                                                                                                                                                                                                                                                                                                         | Efficacious intervention characteristics                                                                            |
|------------------------------------------------------------------------------------------------------------------------------------------------|------------------------------------|------------------------------------------------------------------------------------------------------------------------------------------------------------------------------------------------------------------------------------------------------------------------------------------------------------------------------------------|---------------------------------------------------------------------------------------------------------------------|
| Trials with the education comparator (Boyne et al. 2014; Meng et al. 2016; Freedland et al. 2015; Brodie and Inoue 2005) (Ajiboye et al. 2015) | SMD = 0.31, 95%CI [0.21; 0.40] *** | <p><b>Exercise: SMD = 0.34 , 95%CI [0.18; 0.51];</b></p> <p><b>Remote communication and treatment: SMD = 0.42, 95%CI [0.24; 0.60];</b></p> <p>Exercise and behaviour change: SMD = 0.21, 95%CI [ 0.004; 0.41];</p> <p>Disease Management: SMD = 0.21, 95%CI [ -0.03; 0.45];</p> <p>Self-Management: SMD = 0.23, 95%CI [-0.17; 0.62].</p> | No change in the significance of the effects associated with individual intervention or participant characteristics |

TITLE: Efficacy of interventions to increase physical activity for people with heart failure: a meta-analysis

| EXCLUDED TRIALS                           | Overall effect                          | General Approach                                                                                                                                                                                                                                                                                                                                                                    | Efficacious intervention characteristics                                                             |
|-------------------------------------------|-----------------------------------------|-------------------------------------------------------------------------------------------------------------------------------------------------------------------------------------------------------------------------------------------------------------------------------------------------------------------------------------------------------------------------------------|------------------------------------------------------------------------------------------------------|
| HF-ACTION trial<br>(O'Connor et al. 2009) | SMD = 0.37,<br>95% CI:<br>[0.10; 0.63]* | <b>Exercise: SMD = 0.56, 95%CI [0.18; 0.94];</b><br><br>Remote communication and treatment:<br><br>SMD =0.41, 95%CI [-0.29; 1.11];<br><br>MI: SMD = 0.03, 95%CI [-0.89; 0.94];<br><br><b>Exercise and behaviour change:</b><br><br><b>SMD = 0.21, 95%CI [ -0.59; 1.01];</b><br><br>CBT: SMD = 0.21, 95%CI [-0.91; 1.33];<br><br>Disease Management: SMD =0.23, 95%CI [-0.95; 1.41]. | Behavioural Practice and Rehearsal *<br><br>Graded task *<br><br>Group-based *<br><br>Centre-based * |



TITLE: Efficacy of interventions to increase physical activity for people with heart failure: a meta-analysis

|                                                                          |                                                      |                                              |  |
|--------------------------------------------------------------------------|------------------------------------------------------|----------------------------------------------|--|
| High Risk of Bias trials<br>(Ajiboye et al. 2015;<br>Tomita et al. 2008) | <b>Social Support (emotional) *</b>                  |                                              |  |
|                                                                          | <b>Social Support (practical) **</b>                 |                                              |  |
|                                                                          | <b>TCS score *</b>                                   |                                              |  |
|                                                                          | Monitoring of behaviour by others w/o<br>feedback*   |                                              |  |
|                                                                          | Credible source***                                   |                                              |  |
|                                                                          | Adding objects to the environment ***                |                                              |  |
|                                                                          | Self-monitoring of outcome(s) of<br>behaviour*       |                                              |  |
|                                                                          | <b>Self-monitoring of behaviour *</b>                |                                              |  |
|                                                                          | <b>Information about health<br/>consequences *</b>   |                                              |  |
|                                                                          | <b>Information on how to perform<br/>behaviour *</b> |                                              |  |
|                                                                          | Graded tasks *                                       |                                              |  |
|                                                                          | Action Planning *                                    |                                              |  |
|                                                                          | Goal setting (behaviour) *                           |                                              |  |
|                                                                          | Behavioural Practice and Rehearsal**                 |                                              |  |
|                                                                          | SMD =                                                | Exercise: SMD =0.36, 95%CI [-0.2; 0.91];     |  |
|                                                                          | 0.4578                                               | Remote communication and treatment:          |  |
|                                                                          | 95%CI                                                | SMD = 0.56, 95%CI [-0.57; 1.7];              |  |
|                                                                          | [0.0903                                              | MI: SMD = 0.03, 95%CI [ -1.16; 1.21];        |  |
|                                                                          | 0.8252 *                                             | Exercise and behaviour change:               |  |
|                                                                          |                                                      | SMD = 1.27, 95%CI [0.47; 2.07]***;           |  |
|                                                                          |                                                      | CBT: SMD = 0.21, 95%CI [ -1.38; 1.8];        |  |
|                                                                          |                                                      | Disease Management: SMD =0.23, 95%CI [ -1.39 |  |
|                                                                          |                                                      | 1.85].                                       |  |
|                                                                          |                                                      |                                              |  |
|                                                                          |                                                      |                                              |  |
|                                                                          |                                                      |                                              |  |
|                                                                          |                                                      |                                              |  |
|                                                                          |                                                      |                                              |  |
|                                                                          |                                                      |                                              |  |
|                                                                          |                                                      |                                              |  |

TITLE: Efficacy of interventions to increase physical activity for people with heart failure: a meta-analysis

| EXCLUDED TRIALS                                                              | Overall effect                                 | General Approach                                                                                                                                                                                                                                                                                                                                            | Efficacious intervention characteristics                                                                                                                                                                                                                                                                                                                                                                     |
|------------------------------------------------------------------------------|------------------------------------------------|-------------------------------------------------------------------------------------------------------------------------------------------------------------------------------------------------------------------------------------------------------------------------------------------------------------------------------------------------------------|--------------------------------------------------------------------------------------------------------------------------------------------------------------------------------------------------------------------------------------------------------------------------------------------------------------------------------------------------------------------------------------------------------------|
| HF-ACTION trial<br>(O'Connor et al. 2009)<br>and High Risk of Bias<br>trials | SMD =<br>0.2670 95%CI<br>[0.1549 0.3790<br>*** | <b>Exercise: SMD=0.35, 95% CI [0.15; 0.54]*;</b><br><b>Remote communication and treatment:</b><br><b>SMD=0.47, 95%CI [0.24;0.70]*;</b><br>MI: SMD=0.03, 95%CI [ -0.46;0.52];<br><b>Exercise and behaviour change:</b><br><b>SMD= 0.21; 95%CI:[-0.07; 0.49];</b><br>CBT SMD= 0.21, 95%CI:[-0.15; 0.57]<br>Disease Management SMD= 0.23, 95%CI:[-0.25; 0.71]. | <b>Nurse ***</b><br><b>Telehealth**</b><br><b>Biological Feedback*</b><br>Credible source *<br>Self-monitoring of outcomes of<br>behaviour*<br><b>Self-monitoring of behaviour **</b><br><b>Demonstration of the behaviour **</b><br><b>Information about health<br/>consequences **</b><br>Graded tasks **<br>Action Planning **<br>Goal setting (behaviour)***<br>Behavioural Practice and<br>Rehearsal*** |

TITLE: Efficacy of interventions to increase physical activity for people with heart failure: a meta-analysis

Supplement 7. Publication bias: funnel plot

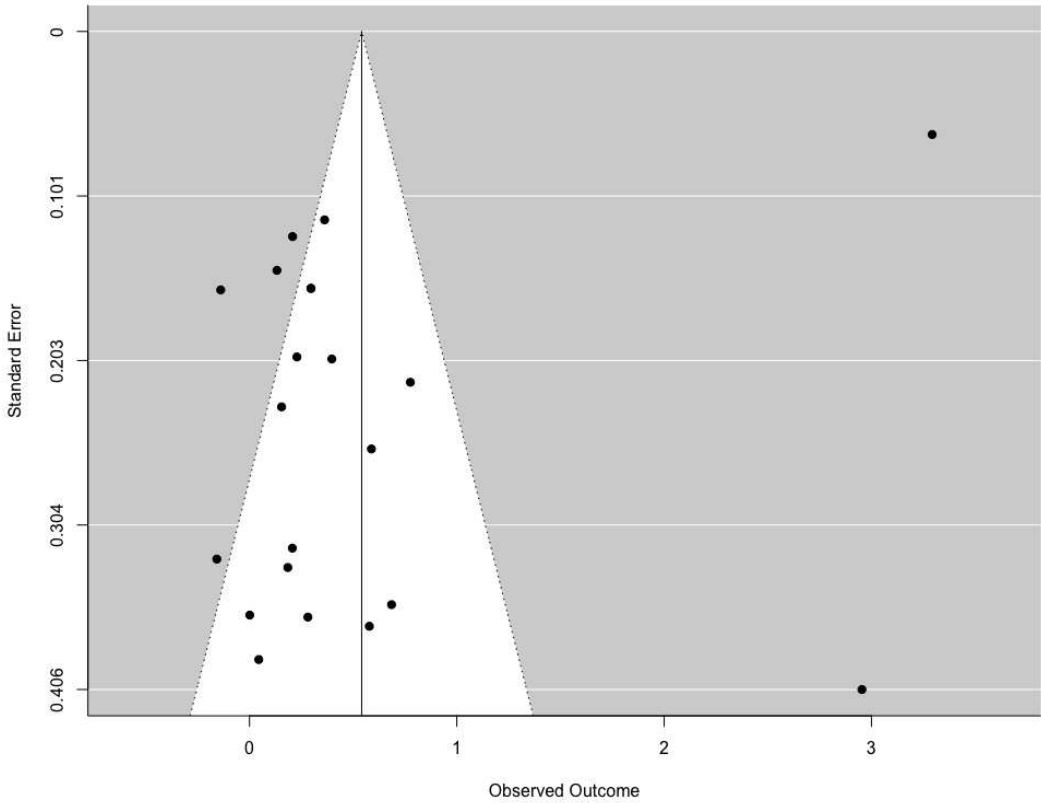

Supplement: openhrt-2021-001687supp001_data_supplement.pdf [file openhrt-2021-001687supp001_data_supplement.pdf]
